1 **Title**

2 Chromosome-level genome assembly of *Rorippa aquatica* revealed its allotetraploid origin and  
3 mechanisms of heterophylly upon submergence

4  
5 Tomoaki Sakamoto<sup>1,2</sup>, Shuka Ikematsu<sup>1,2</sup>, Hokuto Nakayama<sup>1,3,4</sup>, Terezie Mandáková<sup>5</sup>,  
6 Gholamreza Gohari<sup>6</sup>, Takuya Sakamoto<sup>7</sup>, Gaojie Li<sup>8</sup>, Hongwei Hou<sup>8</sup>, Sachihito Matsunaga<sup>9</sup>,  
7 Martin A. Lysak<sup>5</sup>, and Seisuke Kimura<sup>1,2,\*</sup>

8  
9 **Affiliations**

10 1. Faculty of Life Sciences, Kyoto Sangyo University, Kamigamo-motoyama, Kita-ku, Kyoto  
11 603–8555, Japan

12 2. Center for Plant Sciences, Kyoto Sangyo University, Kamigamo-motoyama, Kita-ku, Kyoto  
13 603–8555, Japan

14 3. Graduate School of Science, Department of Biological Sciences, The University of Tokyo,  
15 Science Build. #2, 7-3-1 Hongo Bunkyo-ku Tokyo, 113-0033, Japan

16 4. Department of Plant Biology, University of California Davis, One Shields Avenue, Davis,  
17 CA 95616, U.S.A

18 5. CEITEC – Central European Institute of Technology, Masaryk University, Brno, CZ-625 00,  
19 62500 Czech Republic

20 6. Department of Horticulture, Faculty of Agriculture, University of Maragheh, Maragheh, Iran

21 7. Department of Applied Biological Science, Faculty of Science and Technology, Tokyo  
22 University of Science, 2641 Yamazaki, Noda, Chiba 278-8510, Japan

23 8. The Key Laboratory of Aquatic Biodiversity and Conservation of Chinese Academy of  
24 Sciences, Institute of Hydrobiology, Chinese Academy of Sciences, Wuhan, Hubei, 430072,  
25 China

26 9. Department of Integrated Biosciences, Graduate School of Frontier Science, The University  
27 of Tokyo, Chiba, Japan

28  
29 **Corresponding author**

30 \*Seisuke Kimura.

31 Email: [seisuke@cc.kyoto-su.ac.jp](mailto:seisuke@cc.kyoto-su.ac.jp)

32 **Competing Interest Statement:** The authors declare no competing interest.

33 **Keywords:** heterophylly, comparative genomics, polyploidy, *Rorippa aquatica*, Brassicaceae

34

## 35 **Abstract**

36       The ability to respond to environmental variability is essential for living systems, especially  
37 to sessile organisms such as plants. The amphibious plant *Rorippa aquatica* exhibits a drastic type  
38 of phenotypic plasticity known as heterophylly, a phenomenon where leaf form is altered in  
39 response to the surrounding environment. Although heterophylly has been studied in various plant  
40 species, its molecular mechanism has not been fully elucidated. To establish the genetic basis and  
41 analyze the evolutionary processes responsible for heterophylly, we assembled the chromosome-  
42 level genome of *R. aquatica* by combining data from Illumina short-read sequencing, PacBio  
43 long-read sequencing, and High-throughput Chromosome Conformation Capture (Hi-C)  
44 sequencing technologies. Fine-scale comparative chromosome painting and chromosomal  
45 genomics revealed that allopolyploidization and subsequent post-polyploid descending dysploidy  
46 occurred during *R. aquatica* speciation. The genomic information above was the basis for the  
47 transcriptome analyses to examine the mechanisms involved in heterophylly, especially in  
48 response to the submerged condition, which uncovered that the ethylene and blue light signaling  
49 pathways participate in regulating heterophylly under submerged conditions. The assembled *R.*  
50 *aquatica* reference genome provides novel insights into the molecular mechanisms and evolution  
51 of heterophylly.

52

## 53 **Introduction**

54       Plants are not able to move from their location once settled; consequently, phenotypic  
55 plasticity facilitates adaptation to fluctuating environments in the permanent habitats. One of the  
56 most striking examples of phenotypic plasticity in plants is heterophylly. Heterophylly refers to  
57 alteration of leaf form in response to environmental conditions, such as light intensity and quality,  
58 ambient temperature, and water availability (1, 2). Elucidating the mechanisms underlying  
59 heterophylly would provide insights into the strategies of adaptation of plants to fluctuating  
60 environments.

61       Heterophylly is often observed in amphibious plants, in which the submerged leaves are  
62 more dissected or thinner than terrestrial leaves (2). For example, submergence leads to thinner  
63 leaves in *Rorippa aquatica* (tribe Cardamineae, Brassicaceae) (3), *Hygrophila difformis*  
64 (Acanthaceae) (4, 5), *Ranunculus trichophyllus* (Ranunculaceae) (6), and *Callitriche palustris*  
65 (Callitricheae) (7). Heterophylly exhibited by amphibious plants is thought to have resulted from  
66 adaptation to fluctuating environments, particularly water level change. The evolution of  
67 heterophylly is a typical example of convergent evolution, as it has occurred multiple times  
68 independently in various taxa. Interestingly, heterophylly exhibits some similarities even at the  
69 molecular level. Previous studies have reported that ethylene is used to signal submergence.  
70 Inhibiting ethylene signaling caused leaves underwater to be similar to aerial leaves, and

71 exogenous ethylene treatment caused thinner leaves, even under terrestrial conditions (4, 6, 7). In  
72 addition, regulation of leaf adaxial–abaxial polarity might be involved in heterophyllous leaf  
73 shape alternation in *Ranunculus trichophyllus* (6) and *Callitriche palustris* (7).

74 *Rorippa aquatica*, an amphibious plant found in the North American bays of lakes, ponds,  
75 and streams (8), exhibits dramatic heterophylly in response to various environmental signals, such  
76 as temperature, light quantity, and submergence (3). Its leaves become more deeply dissected and  
77 thinner underwater than in air (Fig. 1A, B). A previous study demonstrated that the mechanism of  
78 heterophylly in response to temperature in *R. aquatica*. Changes in the expression of *KNOTTED1-*  
79 *LIKE HOMEODOMAIN (KNOX1)* gene in response to temperature and light intensity, lead to altered  
80 concentration of gibberellins and cytokinin in the leaf primordia, which, in turn, alters leaf  
81 morphology (3).

82 There have been notable advances in our understanding of the mechanisms of regulation  
83 of heterophylly in various species (3, 4, 6, 7, 9). Nonetheless, considering plants that show  
84 remarkable heterophylly are not model plants, the genomic information that could facilitate the  
85 elucidation of the underlying molecular mechanisms and evolutionary processes is lacking. *R.*  
86 *aquatica* is closely related to the model plant *Arabidopsis thaliana*, and *Cardamine hirsuta* (tribe  
87 Cardamineae, Brassicaceae), a model plant for compound leaf development (10–12). Therefore  
88 *R. aquatica* is potential excellent model species for studying the mechanistic basis and evolution  
89 of heterophylly. We have previously reported that the somatic cells of *R. aquatica* have 30  
90 chromosomes (13), whereas the base chromosome number ( $x$ ) in the related Cardamineae species  
91 is eight, and diploid species have  $2n = 2x = 16$  (14), which suggests that *R. aquatica* is a polyploid.  
92 In addition, the fact that the chromosome number of *R. aquatica* is not a multiple of eight suggests  
93 that its genome was restructured after polyploidization.

94 The evolution of plasticity is attracting considerable attention among researchers (15, 16),  
95 and understanding the evolution of heterophylly in *R. aquatica* could facilitate the elucidation of  
96 the evolutionary acquisition of phenotypic plasticity. In the present study, we performed  
97 chromosome-level genome assembly of *R. aquatica* and revealed its chromosome architecture  
98 and the evolution of its genome structure. This is the first case in which genomic information has  
99 been completed at chromosome level for a plant that exhibits remarkable heterophylly. We also  
100 combined the transcriptome data with genomic data and physiological analyses to reveal the  
101 mechanisms of heterophylly in response to submergence, and the results suggested that the  
102 response to submergence is modulated by ethylene and light signaling pathways. Our results could  
103 shed light on the molecular pathways via which heterophylly facilitates adaptation to  
104 environmental fluctuations.

105

## 106 **Results**

### 107 **Chromosome architecture of *Rorippa aquatica* revealed via comparative cytogenomics**

108 *R. aquatica* has 15 chromosome pairs ( $2n = 30$ , hereafter listed as chromosomes RaChr01  
109 to RaChr15) (13) (Fig. 1C). We examined the *R. aquatica* genome structure and evolutionary  
110 processes via comparative chromosome painting (CCP) based on the localization of contigs of  
111 chromosome-specific Bacterial Artificial Chromosome (BAC) clones of *A. thaliana* on meiotic  
112 (pachytene) chromosomes (see Fig. 1C for examples of CCP). The painting probes were designed  
113 to reflect the system of 22 ancestral genomic blocks (GBs, labeled as A to X) (17, 18) and eight  
114 chromosomes of the ancestral Cardamineae genome (19). As all 22 GBs were found to be  
115 duplicated within the *R. aquatica* haploid chromosome complement, the species has a tetraploid  
116 origin (Fig. 1C).

117 We used CCP to reconstruct a complete comparative cytogenetic map of *R. aquatica* (Fig.  
118 1C), and compared it to the ancestral genome of the tribe Cardamineae with eight chromosomes  
119 (19). Fourteen out of the 15 chromosome pairs in *R. aquatica* (RaChr01–RaChr14) are shared  
120 with the ancestral Cardamineae genome. Due to its polyploid origin, the *R. aquatica* genome  
121 contains six pairs of Cardamineae homeologues: AK1 (GBs A+B+C; RaChr01 and RaChr02),  
122 AK3 (F+G+H; RaChr04 and RaChr05), AK4 (I+J; RaChr06 and RaChr07), AK5 [(K–L)+(M–N);  
123 RaChr08 and RaChr09], AK6/8 (V+Wa+Q+R; RaChr10 and RaChr11), and AK7 (S+T+U;  
124 RaChr12 and RaChr13). Chromosomes RaChr03 and RaChr14 are homeologous to ancestral  
125 chromosomes AK2 (D+E) and AK8/6 (O+P+Wb+X), respectively. Chromosome RaChr15  
126 (O+P+E+D+Wb+X) originated via nested chromosome insertion (NCI) of the AK2 homeologue  
127 into the centromere of the AK8/6 homeologue. At least three paracentric inversions post-dated the  
128 NCI event (Fig. 2). Comparative cytogenomic analysis confirmed the tetraploid origin of *R.*  
129 *aquatica* and allowed us to reconstruct the structure of the RaChr15 fusion chromosome.

130

### 131 **Chromosomal genome assembly and annotation**

132 We assembled the *R. aquatica* genome and predicted its gene structure. As a reference, we  
133 used *R. aquatica* accession N, in which heterophylly was highly responsive to temperature (20).  
134 Hybrid genome assembly with Illumina short reads and PacBio long reads was performed using  
135 the MaSuRCA assembler (21). The assembled draft contigs were scaffolded using Hi-C Seq reads.  
136 Hi-C Seq provides information about the physical contact between the genomic loci in the nuclei.  
137 Therefore, given that the chromosomes are clustered in the nuclei, Hi-C Seq data scaffolding  
138 allows chromosome-level assembly. This generated 15 chromosome-level sequences and 2,040  
139 fragments (Table S1). The total length of chromosome sequence and whole sequence were  
140 approximately 414 and 452 Mb, respectively, similar to the expected genome size (420–450 Mb)  
141 obtained using k-mer counting (Fig. S1 and Table S2). Benchmarking Universal Single-Copy

142 Orthologs (BUSCO) was used to evaluate the assembled genome quality (Fig. S2). In total, 1,614  
143 conserved single-copy land plant genes were screened within the *R. aquatica* genome, and 97.6%  
144 were identified, indicating the high reliability of the assembled genome. Among the 1,614 genes,  
145 52.6% of the genes were found to be duplicated. Repeat sequences in the genome were identified  
146 (Table S3) and masked for subsequent analyses. Gene structures were predicted using the Program  
147 to Assemble Spliced Alignments (PASA) pipeline (22, 23). The results of prediction obtained  
148 using several methods were merged into an integrated gene structure, resulting in the  
149 identification of 46,197 genes (Table S4). BUSCO assessment to protein sequences from *R.*  
150 *aquatica* gene data identified 94.4% of the conserved genes (Fig. S2), indicating the high  
151 reliability of the gene annotation. *R. aquatica* has 1.6–1.7 times more genes than the diploid  
152 Brassicaceae species, such as *A. thaliana* (27,416 genes) and *C. hirsuta* (29,458 genes).

153

#### 154 **Evolutionary processes revealed via comparative genomics**

155 Although the ancestral chromosome number of Cardamineae is  $x = 8$ , *R. aquatica* has a  
156 hypotetraploid chromosome number ( $2n = 30$ ). This chromosome number and the structure of the  
157 *R. aquatica* genome were elucidated by cytogenomic analyses (Figs. 1C and 2) as a whole-  
158 genome duplication followed by a chromosome fusion that reduced the 16 chromosome pairs to  
159 15. To further explore this evolutionary process in *R. aquatica*, comparative genomics analysis  
160 was performed based on the chromosome sequences.

161 Using OrthoFinder analysis of the entire genome, a genome-level phylogeny of *R. aquatica*  
162 and related species was constructed. The longest protein sequences of each gene were extracted  
163 and used as the genome-level protein dataset in the present analysis. The datasets of 24 species  
164 were obtained from public genome databases. For intra-genus analyses, the preliminary dataset  
165 of *Rorippa islandica* ( $2n = 16$ ) (24) was prepared by genome assembly and subsequent gene  
166 prediction using public genome-seq read data. Based on the constructed phylogenetic tree, *R.*  
167 *aquatica* and *R. islandica* were placed in the clade that includes *Arabidopsis* (Fig. S3),  
168 corresponding to the Brassicaceae clade A (25). *Barbarea vulgaris* is the closest species and *C.*  
169 *hirsuta* is the closer sister of the genus *Rorippa*.

170 To investigate the origin of the *R. aquatica* genome, we compared the chromosome-level  
171 assemblies of *R. aquatica* and *C. hirsuta* (Fig. S4). Multiple alignment based on nucleotide  
172 similarity showed that each chromosome of *C. hirsuta* was similar to two *R. aquatica*  
173 chromosomes, indicating a tetraploid origin of the latter species. The collinearity of the RaChr15  
174 fusion chromosome with the *C. hirsuta* chromosomes Chr2 and Chr8 indicates that this *R.*  
175 *aquatica* chromosome was formed via an NCI involving the *Rorippa* homeologues RaChr03 and  
176 RaChr14, consistent with our CCP-based results (Fig. 2).

177 The divergence ages of duplicated genes could indicate when *R. aquatica* attained its  
178 tetraploid-like characteristics. To estimate divergence ages in the Brassicaceae, we selected eight  
179 species (*A. thaliana*, *A. lyrata*, *Barbarea vulgaris*, *Capsella rubella*, *Cardamine hirsuta*, *Eutrema*  
180 *salsugineum*, *R. aquatica*, and *R. islandica*). All genes in each genome were clustered into  
181 orthogroups (i.e., groups consisting of orthologous genes) based on protein similarity. In total,  
182 10,845 single-copy orthogroups were found upon comparing six of the eight species (excluding  
183 *R. aquatica* and *R. islandica*). In *R. islandica*, almost all (91.2%) were single-copy genes, whereas  
184 in *R. aquatica*, 58.6% were duplicated genes (Table S5). This suggests that the *R. aquatica*  
185 genome underwent large-scale gene duplication. To estimate species divergence and gene  
186 duplication ages, we calculated the synonymous nucleotide substitution rate (Ks) between gene  
187 orthologs, both inter- and intra-species. To calculate Ks, we used the longest coding DNA  
188 sequences of each gene conserved as a single copy in the seven Brassicaceae species and  
189 duplicated in *R. aquatica*; this resulted in 5,856 sequences. The Ks distributions of *R. aquatica*  
190 compared with other species and those of *R. islandica* were quite similar, reflecting phylogenetic  
191 relatedness (Fig. S5). Divergence ages were estimated using Ks as  $T$  (in years) =  $Ks / (2 * \mu)$ ,  
192 where  $\mu = 6.51648E-09$  synonymous substitutions/site/year for Brassicaceae (26). On that basis,  
193 the divergence times between *Cardamine* and *Rorippa*, and between *Barbarea* and *Rorippa* are  
194 13.7–14.2 million years ago (Mya) and 10.5–10.8 Mya, respectively (Table S6). The Ks  
195 distribution based on the duplicated paralogs of *R. aquatica* has a single peak with a median of  
196  $Ks = 0.102$ , corresponding to a divergence of 7.8 Mya. This suggests that large-scale gene  
197 duplication in *R. aquatica* occurred after the *Barbarea/Rorippa* divergence, and most likely  
198 occurred at the whole-genome level. In *R. aquatica* and *R. islandica*, the median of Ks is 0.073,  
199 corresponding to a divergence of 5.6 Mya. Although *R. islandica* has diploid characteristics (Table  
200 S5) and chromosome number of  $2n = 16$  (24), our findings indicate that these two *Rorippa* species  
201 diverged after the whole-genome duplication (WGD).

202 To elucidate this conflict, Ks between *R. aquatica* and *R. islandica* was analyzed at the  
203 chromosome level. The chromosomes of *R. aquatica* form two subgenome groups based on their  
204 distribution of Ks calculated relative to the *R. islandica* genome (Fig. 3A and Table S7, S8). The  
205 first group, named subgenome A, includes eight chromosomes (RaChr01, -03, -05, -07, -08, -10,  
206 -13, and -14) with a median Ks value of approximately 0.05. These chromosomes are closer to  
207 those of *R. islandica*. Subgenome B includes seven chromosomes (RaChr02, -04, -06, -09, -11, -  
208 12, and -15) with a median Ks value of approximately 0.09. These chromosomes are  
209 phylogenetically more distant from those of *R. islandica*; their Ks values relative to *R. islandica*  
210 are similar to those between the duplicated *R. aquatica* genes. The fact that *R. aquatica* has two  
211 subgenomes with different divergence ages indicates that it has an allotetraploid origin caused by  
212 hybridization between two ancestral *Rorippa* species. Integration of various genomic analyses

213 clarified the structure of the *R. aquatica* genome (Fig. 3B). The homologous chromosomes in  
214 each subgenome show a similar distribution of genes and long terminal repeats (LTRs). The peaks  
215 of the LTR distribution in each chromosome indicate centromeric regions. These results also  
216 suggest that gene duplication in the species occurred via a WGD.

217 Comparative genomics revealed the evolutionary process of establishing the present *R.*  
218 *aquatica* (Fig. 3C): assuming an allotetraploid origin of *R. aquatica*, *Rorippa* split into the  
219 subgenome groups A and B approx. 7.2 Mya ( $K_s = 0.09$ ). In the subgenome A group, divergence  
220 into the ancestor of *R. islandica* and the parental species of *R. aquatica* occurred 4.2 Mya ( $K_s =$   
221  $0.05$ ). Subsequent hybridization of two species from different subgenome groups resulted in the  
222 formation of the allotetraploid origin of *R. aquatica*. Phylogenetic analysis based on plastid  
223 sequences placed *R. islandica* in a clade distant from *R. aquatica* (13). This suggests a paternal  
224 origin of subgenome A of *R. aquatica*. Our analysis does not identify the seed parent of  
225 subgenome B. Based on  $K_s$  analysis, the fusion chromosome RaChr15 was formed by intra-  
226 subgenomic fusion. The median  $K_s$  value of RaChr15 versus *R. islandica* was approximately 0.09,  
227 similar to the other chromosomes of subgenome B (Fig 3A and Table S7). Chromosomes RaChr03  
228 and RaChr14, within subgenome A, remained as independent chromosomes.

229

### 230 **Transcriptome analysis reveals the pathway underlying heterophylly in response to** 231 **submergence**

232 To elucidate the mechanism of heterophylly in response to submergence, we conducted  
233 RNA-seq gene expression analysis using the assembled *R. aquatica* genome data. First, we  
234 observed the morphology of young leaves over time to determine the timing of leaf shape change  
235 upon submergence (Fig. 4A). After 1 day of submergence, submerged and terrestrial leaves did  
236 not differ morphologically. After 4 days of submergence, the young-leaf margin serrations became  
237 deeper in the submerged compared to in terrestrial plants. After 7 days of submergence, leaf  
238 incisions were significantly deeper in the submerged leaves. To reveal the gene expression  
239 patterns of early response to submergence as well as the early stage of leaf morphology  
240 differentiation, shoot apices containing young leaves were sampled at 1 hour and 4 days after  
241 submergence and RNA-seq analysis was performed. As a result, we identified 787 upregulated  
242 and 1,091 downregulated genes 1 hour after submergence, which increased to 5,358 upregulated  
243 genes and 4,945 downregulated genes after 4 days of submergence (Fig. 4B). The submergence-  
244 responsive differentially expressed genes (DEGs) were classified into three classes according to  
245 the timing of expression. The genes whose expression changed only within 1 hour of submergence  
246 were classified as “early response genes.” The genes whose expression changed after 1 hour as  
247 well as after 4 days of submergence were classified as “throughout response genes.” The genes

248 whose expression changed only after 4 days of submergence were classified as “late response  
249 genes.”

250 Next, we used Gene Ontology (GO) enrichment analysis to elucidate the biological  
251 processes involved in regulating heterophylly (Fig. 4B and Supplementary information 1). Among  
252 early response upregulated genes, those in the “shade avoidance” category (GO-ID: 9641) were  
253 enriched, suggesting that light conditions are important in the early response to submergence.  
254 Significant numbers of both up- and down-regulated genes were related to phytohormones, such  
255 as ethylene (GO-ID: 9723), gibberellin (GO-ID: 9739), and abscisic acid (GO-ID: 9737). Some  
256 of the down-regulated genes were enriched in “response to auxin stimulus” (GO-ID: 9641). The  
257 results are consistent with previous findings (20) that phytohormones participate in regulation of  
258 heterophylly. Genes related to aspects of leaf morphology such as leaf development (GO-ID:  
259 48366) and leaf morphogenesis (GO-ID: 9965) were downregulated in response to submergence.  
260 Those involved in adaxial/abaxial axis specification (GO-ID: 9943) were downregulated during  
261 the late response. Regulation of cell division and elongation is essential in altering leaf  
262 morphology. At the late stage, when the leaf morphology differed between the submerged and  
263 terrestrial leaves, genes belonging to the cell cycle (GO-ID: 7049) and cell division (GO-ID:  
264 51301) categories were enriched among the downregulated genes. The results indicate that the  
265 expression of genes involved in leaf development is regulated immediately after submergence,  
266 and that phytohormones are involved in the regulation.

267

### 268 **Ethylene induces the submerged-leaf phenotype**

269 The gene expression profiling revealed the importance of gibberellin in *R. aquatica*  
270 heterophylly, which is consistent with the previous study (3). Furthermore, abscisic acid is vital  
271 for the response to aquatic environments (4, 7, 27). Nonetheless, the relationship between ethylene  
272 and heterophylly in *R. aquatica* remains to be elucidated.

273 In numerous plant species, ethylene accumulation in plant tissue during submergence  
274 triggers the submergence response; for instance, ethylene participates in heterophylly in some  
275 plant species (28). Therefore, we examined the relationship between ethylene and *R. aquatica* leaf  
276 shape. Treating terrestrial *R. aquatica* plants with 1-aminocyclopropane-1-carboxylic acid (ACC),  
277 an ethylene precursor, resulted in the formation of more deeply lobed leaves, with thinner leaf  
278 blades than those in the untreated terrestrial plants (Fig. 5A). In contrast, when the ethylene-  
279 response inhibitor AgNO<sub>3</sub> was added under submerged conditions, leaves with expanded blades,  
280 similar to the terrestrial leaves, were formed (Fig. 5B). Further, as the concentration of ethylene  
281 was increased, thinner leaf blades developed (Fig. 5C). The results indicate that heterophylly in  
282 *R. aquatica* is regulated by the levels of ethylene hormone. The submerged-phenotype of leaf was



283 suppressed by inhibiting the ethylene response even under submerged conditions, suggesting that  
284 the regulation of heterophylly is mediated by the ethylene response pathway.

285 Next, we performed RNA-seq analysis of ACC-treated plants to identify the genes  
286 responsible for submerged-type leaf formation. Since ACC treatment induced the formation of  
287 submerged-type leaves, we extracted genes whose expression changed both under submerged and  
288 ACC-treated conditions (Fig. 5D, E and Supplementary information 2): 143 genes were  
289 commonly upregulated, and 82 genes were commonly down-regulated. As expected, several  
290 common ethylene response genes were upregulated in both datasets.

291 One of the commonly regulated genes, *LONGIFOLIA* (*LNG1* and *LNG2*), has been  
292 identified to participate in leaf morphogenesis in *A. thaliana* via activation-tag gene screening  
293 (29): the dominant mutant of *LNG1* (*lng1-ID*) formed elongated and narrow leaves with serrated  
294 margins; furthermore, *LNG1* and *LNG2* may work redundantly and regulate longitudinal cell  
295 elongation.

296 *LATE MERISTEM IDENTITY1* (*LMII*) and *REDUCED COMPLEXITY* (*RCO*) arose from  
297 the same ancestral gene via gene duplication within a clade of Brassicaceae (30). *RCO* controls  
298 leaf complexity (30) in *C. hirsuta* wherein the wildtype has compound leaves but the *rco* mutant  
299 displays simple lobed leaves. *RCO* is lost and *LMII* remains in *A. thaliana* emerging simple leaves,  
300 and the introduction of *C. hirsuta* *RCO* into *A. thaliana* resulted in the formation of serrations.  
301 The *R. aquatica* gene *RaChr03G09000*, extracted as an *A. thaliana* *LMII*, is an *RCO* ortholog,  
302 because of higher protein identity to *C. hirsuta* *RCO* (84.3%) than *C. hirsuta* *LMII* (63.1%). The  
303 upregulation of *R. aquatica* *RCO* might cause compound leaf formation.

304 *PHABULOSA* (*PHB*), a member of the class III HD-ZIP gene family, leads cells toward  
305 adaxialization. Its dominant mutant, *phb-1d*, forms adaxialized radial leaves (31). Loss of function  
306 of *PHB* and other related class III HD-ZIP genes caused abaxialized radial cotyledons (32).  
307 Establishment of adaxial–abaxial polarity is required for leaf blade expansion, and loss of this  
308 polarity induces leaf radialization. The involvement of regulation of adaxial–abaxial polarity to  
309 heterophylly was reported in *Ranunculus trichophyllus* (6): submergence upregulated the genes  
310 *KANADIs*, which regulates abaxial growth, leading to the formation of abaxialized radial leaves.  
311 In the present study, expression of most of the adaxial–abaxial polarity genes, including *PHB*,  
312 was downregulated under submerged and ACC-treated conditions (Fig. 5F), suggesting that the  
313 loss of polarity is involved in the formation of submerged-type leaves.

314

### 315 **Blue light inhibits the submergence signal**

316 In addition to the genes related to leaf morphogenesis, genes in the GO categories “response  
317 to light stimulus” and “shade avoidance” were affected by submergence (Fig. 4B). Submergence  
318 alters light quality via absorption and reflection in the water, and light quality influences various

319 physiological responses in plants. We investigated how light quality influences leaf form under  
320 various light conditions. Blue light induced a pronounced response, causing the leaves to elongate  
321 along the anterior–posterior axis, and preventing leaflet narrowing in response to submergence  
322 (Fig. 6A). Based on our transcriptome analysis comparing the effects of white and blue light, the  
323 expression profile of submerged leaves under blue light was negatively correlated with that under  
324 white light (Fig. 6B), indicating that gene regulation normally induced during submergence under  
325 white light was not induced by submergence under blue light. In particular, the expression of  
326 submergence-induced ethylene response genes decreased under blue light (Fig. S6). Furthermore,  
327 the expression of abaxial–adaxial polarity regulating genes was not reduced under blue light.  
328 These findings indicate that the submergence signal was inhibited under blue light conditions via  
329 the ethylene response pathway.

330

### 331 **Discussion**

332 The chromosome-level genome assembly and comparative genomics analysis reveal the  
333 genome structure of *R. aquatica*, and elucidate its origin and evolution. We found that the *R.*  
334 *aquatica* genome originated by allotetraploidization through hybridization between two ancestral  
335 *Rorippa* species (Fig. 3). The hybridization occurred no earlier than 4.2 Mya, when *R. aquatica*  
336 subgenome A diverged from *R. islandica*. Thus, the genome of *R. aquatica* originated by  
337 hybridization between two *Rorippa* genomes with 8 chromosome pairs. The WGD was followed  
338 by post-polyploid descending dysploidy (from  $n = 16$  to  $n = 15$ ) mediated by nested chromosome  
339 insertion (NCI), and forming the fusion chromosome RaChr15. The NCI occurred independently  
340 in some population(s) of the tetraploid *Cardamine pratensis* (from  $2n = 32$  to  $2n = 30$ ) (33).  
341 Interestingly, both NCI events in *Cardamine* and *Rorippa* involved chromosome AK8/6 as a  
342 recipient chromosome, which recombined with chromosome AK2 in *R. aquatica* to form  
343 chromosome RaChr15, and chromosome AK5 in *C. pratensis*. Even more advanced post-  
344 polyploid descending dysploidy was documented in the tetraploid *C. cordifolia* where the  
345 chromosome number was reduced from  $2n = 32$  to  $2n = 24$  due to formation of five fusion  
346 chromosomes (34). On the contrary, the closely related tetraploid genomes ( $2n = 4x = 32$ ) of  
347 horseradish (*Armoracia rusticana*) and watercress (*Nasturtium officinale*) contain structurally  
348 conserved parental subgenomes, except for a 2.4-Mb long unequal translocation in watercress  
349 (35). The *R. aquatica* genome sequence and assembly represent a genome-wide reference for  
350 future studies in *R. aquatica* and across the genus *Rorippa*.

351 Our transcriptome analysis of *R. aquatica*, based on whole genome assembly data, provides  
352 three key insights into heterophylly (Fig. 6C). First, the submergence signal was transmitted via  
353 ethylene, and the ethylene signaling inhibited leaf blade expansion. We found that ethylene  
354 signaling was induced by submergence, and exogenous ethylene resulted in narrower leaves even

355 out of water. Since these responses have been reported in other amphibious plants (4, 7, 6) and  
356 ethylene signaling is a conserved pathway among angiosperms (36), it is potentially easily utilized  
357 as a submergence signal; this is consistent with its apparent role of regulating heterophylly in  
358 response to submergence in various plant species.

359 Gibberellins are also involved in regulation of *R. aquatica* leaf form, under both terrestrial  
360 and submerged conditions (3). Gibberellin treatment caused the emergence of simple leaves under  
361 low temperature and submergence, conditions normally inducing dissected leaves, and inhibiting  
362 the gibberellin signal caused dissected leaves even at high temperatures, inducing simple leaves.  
363 In the present study, however, the expression profile revealed increased gibberellin signaling in  
364 response to submergence. In other amphibious plants, which do not exhibit apparent heterophylly  
365 in response to temperature under the terrestrial condition, gibberellins exhibited different effects.  
366 Inhibiting the gibberellin signal suppresses the formation of the submerged-leaf phenotype, and  
367 gibberellin treatment fails to induce this leaf phenotype under terrestrial condition (4, 7). This  
368 suggests that *R. aquatica* leaf form might be regulated by two parallel pathways: temperature-  
369 dependent heterophylly mediated by gibberellins, and submergence-responsive heterophylly  
370 mediated by ethylene. How the two different pathways are regulated and interact is a subject for  
371 future work.

372 A second key insight of our study is that, in *R. aquatica*, both adaxial and abaxial genes  
373 were downregulated under submergence. This is similar to the situation in *Callitriche palustris*  
374 (7). The establishment of adaxial–abaxial polarity eventually leads to the establishment of the  
375 middle domain, which is situated at the juxtaposition between the adaxial–abaxial domains, and  
376 participates in leaf lamina outgrowth (37). Therefore, in *R. aquatica*, the suppression of leaf-blade  
377 expansion in submerged leaves may be due to changes in genes involved in establishing adaxial–  
378 abaxial polarity; such changes may prevent the establishment of the middle domain required for  
379 leaf blade outgrowth.

380 A third key insight of our study is that blue light is involved in regulating heterophylly. At  
381 the gene expression level, blue light blocked ethylene response-gene upregulation during  
382 submergence. Although the mechanism via which blue light regulates heterophylly through  
383 ethylene is unclear, the relationship between blue light and ethylene was studied in the shade  
384 avoidance response. For instance, in *A. thaliana*, low blue light induces stem elongation for shade  
385 avoidance, but not in ethylene-insensitive mutants (38). The molecular mechanisms underlying  
386 the blue light and ethylene response pathways are not clear, even in *A. thaliana*. In plants, blue-  
387 light reception is mediated by cryptochromes (CRYs) (39). In *Brassica napus*, overexpression of  
388 *CRY1* causes downregulation of the ethylene-biosynthesis-related genes *1-aminocyclopropane-1-*  
389 *carboxylate synthase 5* and *8* (40). Under natural conditions, the quality of light reaching  
390 submerged plants changes with the water level, owing to differences in light-absorbance ratios.

391 Changes in light quality might provide detailed signals about the underwater conditions. Our  
392 findings show that blue light plays an important role in regulating heterophylly in response to  
393 submergence. Considering that amphibious fern *Marsilea quadrifolia* showed similar response  
394 (41), blue light signaling may also be central to heterophylly in various plants. Elucidating blue  
395 light signaling may be key to elucidating heterophylly and its evolution.

396 The allotetraploid origin of *R. aquatica* suggests several possible mechanisms by which it  
397 attained traits such as amphibiousness and heterophylly in response to various signals. For  
398 instance, they could have arisen via inheritance from either parent or it could be a result of  
399 heterosis arising from crossing with other *Rorippa* species. Furthermore, they could have arisen  
400 from redundancy due to gene duplication, which often enables genes to acquire novel functions.  
401 Finally, the accelerated accumulation of mutations may have given rise to these traits. Future  
402 comparative studies of the species of origin of each subgenome is required to address these  
403 possibilities.

404

## 405 **Materials and methods**

406

### 407 **Plant material**

408 *Rorippa aquatica* plants (two accessions, N and S) (20) were kept in a growth chamber at  
409 30 °C under continuous light at 50  $\mu\text{mol photons m}^{-2} \text{s}^{-1}$  supplied by a fluorescent lamp. For each  
410 treatment, plants that regenerated from a leaf tip as described previously (42) were used.

411 To induce inflorescences for comparative chromosome painting, the growth chamber  
412 temperature for *R. aquatica* accession S was changed to 20 °C. Young inflorescences were  
413 collected from plants and fixed in freshly prepared fixative (ethanol: acetic acid, 3:1) overnight,  
414 transferred to 70% ethanol, and subsequently stored at -20 °C.

415 All plants used for morphological and transcriptome analyses were grown in a growth  
416 chamber at 25 °C. Plants which were used to examine the change of morphology and gene  
417 expression after transition to the submerged condition were grown in glass tanks with an  
418 approximate 8-cm water depth. To examine how ethylene affects heterophylly, all the plants were  
419 treated with 100  $\mu\text{M}$  1-aminocyclopropane-1-carboxylic acid (ACC) or 1  $\mu\text{M}$   $\text{AgNO}_3$ . For  
420 chemical treatment under submerged conditions, the chemicals to be tested were diluted in the  
421 200 mL sterile distilled water in the culture jar. All plants were grown under each treatment for  
422 two months, until the leaves were mature. To examine the effect of ethylene amount, plants were  
423 treated with different concentrations of ACC (10, 100 and 1000  $\mu\text{M}$ ) under the terrestrial  
424 condition as described above. To examine the effects of blue light, plants were grown under 20  
425  $\mu\text{mol photons m}^{-2} \text{s}^{-1}$  supplied by a blue LED.

426

## 427 **Chromosome preparation**

428 Chromosome spreads from fixed young flower buds containing immature anthers were  
429 prepared according to published protocols (43, 44). Chromosome preparations were treated with  
430 100 µg/mL RNase in 2× sodium saline citrate (SSC, 20× SSC: 3 M sodium chloride, 300 mM  
431 trisodium citrate, pH 7.0) for 60 min, and with 0.1 mg/mL pepsin in 0.01 M HCl at 37 °C for 5  
432 min, then post-fixed in 4% formaldehyde in distilled water and dehydrated via an ethanol series  
433 (70%, 90%, and 100%, 2 min each).

434

## 435 **Painting probes**

436 For comparative chromosome painting (CCP), 674 chromosome-specific BAC clones of  
437 *Arabidopsis thaliana* (The Arabidopsis Information Resource, TAIR; <http://www.arabidopsis.org>)  
438 were used to establish contigs corresponding to the 22 genomic blocks (GBs) and eight  
439 chromosomes of the Ancestral Crucifer Karyotype (ACK) (18). To determine and characterize  
440 inversions of GBs on chromosome Ra15, BAC contigs corresponding to GBs D and E were split  
441 into smaller subcontigs and differentially labelled to be used in several consecutive experiments.  
442 All DNA probes were labelled with biotin-dUTP, digoxigenin-dUTP, or Cy3-dUTP by nick  
443 translation, as per Mandáková & Lysak (45).

444

## 445 **Comparative chromosome painting**

446 DNA probes were pooled appropriately, ethanol precipitated, dried, and dissolved in 20 µL  
447 of 50% formamide and 10% dextran sulfate in 2× SSC. The dissolved probe (20 µL) was pipetted  
448 onto a chromosome-containing slide and immediately denatured on a hot plate at 80 °C for 2 min.  
449 Hybridization was conducted in a moist chamber at 37 °C overnight. Post-hybridization washing  
450 was performed in 20% formamide in 2× SSC at 42 °C. Hybridized probes were visualized either  
451 as the direct fluorescence of Cy3-dUTP or via fluorescently labelled antibodies against biotin-  
452 dUTP and digoxigenin-dUTP (45). Chromosomes were counterstained with 4',6-diamidino-2-  
453 phenylindole (DAPI, 2 µg/mL) in Vectashield antifade (Vector Laboratories). Fluorescence  
454 signals were analyzed and photographed using a Zeiss Axio Imager epifluorescence microscope  
455 with a CoolCube camera (MetaSystems, Altlußheim, Germany). Images were acquired  
456 separately for all four fluorochromes using appropriate excitation and emission filters (AHF  
457 Analysentechnik, Tübingen, Germany). The four monochromatic images were pseudocolored,  
458 merged, and cropped using Photoshop CS (Adobe Systems, Mountain View, CA) and ImageJ  
459 (National Institutes of Health, Bethesda, MA).

460

461 **Illumina genome DNA sequencing**

462 Genome-seq libraries were constructed using whole- or nucleic-genome DNA. For  
463 extraction of nucleic DNA, the nuclear fraction was prepared from whole plants using the ‘Semi-  
464 pure Preparation of Nuclei Procedures’ protocol of the CelLytic PN Isolation/Extraction Kit  
465 (Sigma-Aldrich, St. Louis, MO). Genomic DNA was isolated from the nucleus or whole plant  
466 using a DNeasy Plant mini kit (Qiagen, Hilden, Germany). Genome-seq libraries were prepared  
467 using the Nextera DNA Sample Prep Kit. Sequencing was performed using NextSeq 500,  
468 generating paired-end reads of 151 bp.

469

470 **PacBio genome DNA sequencing**

471 DNA for PacBio library was prepared as follows: crude nuclei were obtained from  
472 regenerated plants (using ca. 1 cm lengths of leaf tip) using the ‘Crude Preparation of Nuclei  
473 Procedures’ protocol of the CelLytic PN Isolation/Extraction Kit (Sigma-Aldrich). DNA  
474 extraction from crude nuclei was performed using two different methods. For the first run, the  
475 Dneasy Plant mini kit was used. For the subsequent two runs, genomic DNA was extracted using  
476 phenol/chloroform/isoamyl alcohol extraction with CTAB buffer and purified using QIAGEN  
477 Genomic-tip 20/G. Long reads were generated using the PacBio RS II system.

478

479 **Hi-C Seq**

480 Preparation of the Hi-C Seq sample was performed as previously (46). HindIII was used  
481 for DNA digestion. For the preparation of the sequencing library, the purified Hi-C sample (500  
482 ng) was diluted to 500  $\mu$ l with dH<sub>2</sub>O, and 500  $\mu$ l of 2 $\times$  binding buffer (BB) (10 mM Tris, 1 mM  
483 EDTA, 2 M NaCl) was added. The diluted Hi-C samples were fragmented to a mean size of 300  
484 bp by sonication using a Covaris M220 sonication system (Covaris, Woburn, MA, USA) in a  
485 milliTUBE 1 ml AFA Fibre (Covaris). The parameters of the program were as follows: power  
486 mode, frequency sweeping; time, 20 min; duty cycle, 5%; intensity, 4; cycles per burst, 200;  
487 temperature (water bath), 6 °C. Biotin-labelled Hi-C samples were then enriched using MyOne  
488 Streptavidin C1 magnetic beads (Veritas, Tokyo, Japan). For this, 60  $\mu$ l of streptavidin beads were  
489 washed twice with 400  $\mu$ l of Tween Wash Buffer (TWB) (5 mM Tris, 0.5 mM EDTA, 1M NaCl,  
490 0.05% Tween-20). The recovery of streptavidin beads was performed by placing the tubes on a  
491 magnetic stand. Subsequently, the beads were added to 1 ml of sheared Hi-C sample. After 15  
492 min of incubation at room temperature under rotation, the supernatant was removed, and the beads  
493 binding biotinylated Hi-C fragments were resuspended in 400  $\mu$ l of 1 $\times$  BB. Then, the beads were  
494 washed once in 60  $\mu$ l RSB (Resuspension buffer) (Illumina, San Diego, CA, USA), and finally  
495 resuspended in 50  $\mu$ l RSB. The enriched biotinylated DNA fragments were subjected to library  
496 construction on beads using the KAPA HyperPrep Kit for Illumina (Roche, Basel, Switzerland)

497 according to the manufacturer's protocol, with 18 cycles of PCR for library amplification. The  
498 amplified DNA fraction (50  $\mu$ l) was corrected and purified using Agencourt AMPure XP  
499 (Beckman Coulter) following the standard protocol, and finally resuspended in 15  $\mu$ l of RSB. The  
500 library was sequenced using a NextSeq 500 system, generating paired-end reads of 151 bp.

501

### 502 **Genome size estimation**

503 The genome size of *R. aquatica* was estimated by k-mer counting using jellyfish2  
504 (<http://www.genome.umd.edu/jellyfish.html>). K-mers from Illumina read data were counted, and  
505 the k-mer distribution was plotted; the distribution peaks from homozygous regions were picked  
506 manually, and genome size (in bases) was calculated as total number of k-mers / peak of k-mer  
507 distribution.

508

### 509 **Genome assembly and annotation**

510 Genome assembly was performed using MaSuRCA (21) with both Illumina and PacBio  
511 reads. The assembled scaffolds were error-corrected using Pilon (47). Scaffolding into  
512 chromosome-level sequences was performed via the 3D de novo assembly (3D-DNA) pipeline  
513 (48), using the assembled scaffolds and Hi-C Seq reads. The remaining gaps in chromosome-level  
514 sequences were filled by LR\_Gapcloser (49), using PacBio reads that were error-corrected using  
515 ColorMap (50). Assembled genome sequences were benchmarked using Benchmarking Universal  
516 Single-Copy Orthologs (BUSCO) (51) with a land-plant dataset (embryophyta\_odb9). Repeat  
517 sequences in the genome were identified and masked using RepeatModeler and RepeatMasker  
518 (<http://www.repeatmasker.org>). Gene prediction was performed using the PASA pipeline (23).  
519 Three types of prediction were used: 1) ab initio prediction using AUGUSTUS (52),  
520 GlimmerHMM (53), and SNAP, with an *Arabidopsis* training dataset; 2) Protein homology  
521 detection using EXONERATE with *A. thaliana* TAIR10 protein data; and 3) Alignment of  
522 assembled transcripts to the genome. Transcriptome data were obtained by de novo assembly  
523 using Trinity (54), with RNAseq data (DRA006777) from a published paper (42). All the  
524 predicted gene structures were integrated into the final gene data using EvidenceModeler (EVM)  
525 (55) and PASA. Gene Ontology terms were assigned to each transcript using Blast2GO (56) based  
526 on the results of a BLASTP homology search against the non-redundant protein sequence (Nr)  
527 database and InterProScan.

528

### 529 **Genome structure**

530 Alignment of *R. aquatica* chromosome sequences to the *C. hirsuta* genome was performed  
531 using MUMMER (57). Genome structure (distribution of genes and long terminal repeats, and  
532 links between paralogous genes) was illustrated using CIRCOS (58).

533

### 534 **Comparative genomics analysis**

535 We performed whole-genome level phylogenetic analysis using *R. aquatica* genomic  
536 information and genome-level data of several plant species. The protein dataset of 22 plant species  
537 from the Phytozome database (<https://phytozome-next.jgi.doe.gov/>). The datasets of *C. hirsuta*  
538 and *Barbarea vulgaris* were prepared using data from each species' genome database  
539 (<http://chi.mpipz.mpg.de/> (59) and <http://plen.ku.dk/Barbarea> (60), respectively). We prepared  
540 draft *Rorippa islandica* genomic data via genome assembly using Velvet (61) with genome-seq  
541 read data (SRR1801303) from the Sequence Read Archive, setting k-mer to 151. Gene prediction  
542 was performed using AUGUSTUS (52) using an *Arabidopsis* training dataset. Protein sequences  
543 of a single representative longest transcript variant for each gene were extracted using an inhouse  
544 Perl script. Using OrthoFinder (62), each protein sequence was clustered into an orthogroup based  
545 on similarity, and the phylogenetic analysis of each orthogroup was integrated as a species tree.

546 The synonymous substitution rate (Ks) was calculated to estimate evolutionary event ages.  
547 Using MACSE (63), we performed multiple-alignment of the coding DNA sequences (CDS) in  
548 each orthogroups in which single-copy conserved genes in seven related Brassicaceae species  
549 (*Eutrema salsugineum*, *Arabidopsis thaliana*, *Arabidopsis lyrata*, *Barbarea vulgaris*, *Cardamine*  
550 *hirsuta*, *Capsella rubella*, and *Rorippa islandica*) and duplicated genes in *R. aquatica* were  
551 classified, then we calculated Ks using yn00 in the PAML package  
552 (<http://abacus.gene.ucl.ac.uk/software/paml.html>). The age of each event was estimated as T (in  
553 years) = Ks of peak / (2 \*  $\mu$ ), where  $\mu$ , the synonymous divergence rate per site per year, equals  
554 6.51648E-09 in Brassicaceae (26).

555

### 556 **Transcriptome analysis**

557 Total RNA was isolated from shoot apexes containing young leaves using RNeasy Plant  
558 Mini kit (QIAGEN, Hilden, Germany). RNAseq libraries were prepared using the Illumina  
559 TruSeq Stranded RNA LT kit (Illumina, CA, USA), according to the manufacturer's instructions.  
560 Libraries were sequenced on the NextSeq500 sequencing platform (Illumina, CA, USA), and 76  
561 bp single-end reads were obtained. The reads were mapped to the genome sequences of *R.*  
562 *aquatica* using Tophat2. Count data were subjected to a trimmed mean of M-value normalization  
563 in edgeR (64). Transcript expression and DEGs were defined using the edgeR GLM approach.

564

### 565 **Data Availability**

566 The assembled *R. aquatica* genome sequences and its annotations have been deposited in  
567 Figshare (10.6084/m9.figshare.19207362). Genome-seq read data and Hi-C seq read data are  
568 available in the DDBJ Sequenced Read Archive (DRA) under the accession numbers DRA010675



569 and DRA013596, respectively. Transcriptome read data are also available in DDBJ DRA under  
570 DRA014113, DRA014114, DRA014164, and DRA014165.

571

## 572 **Acknowledgements**

573 We thank Dr. Neelima Sinha, Dr. Naomi Nakayama, and Dr. Dhanya Radhakrishnan for  
574 useful discussions. This work was financially supported by the JSPS KAKENHI grants 21H02513  
575 and MEXT-Supported Program for the Strategic Research Foundation at Private Universities  
576 grant S1511023 to S. K. and JSPS KAKENHI grants 20H05911 and 22H00415 to S. M. This  
577 work was also supported by the National Key Research and Development Program of China  
578 (2017YFE0128800), the National Natural Science Foundation of China (31870384, 32101254),  
579 and the International Partnership Program of the Chinese Academy of Sciences  
580 (152342KYSB20200021) to H. H. and G. L.

581

## 582 **References**

- 583 1. H. Nakayama, N. R. Sinha, S. Kimura, How Do Plants and Phytohormones Accomplish  
584 Heterophylly, Leaf Phenotypic Plasticity, in Response to Environmental Cues. *Front. Plant*  
585 *Sci.* **8**, 1717 (2017).
- 586 2. G. Li, S. Hu, H. Hou, S. Kimura, Heterophylly: Phenotypic Plasticity of Leaf Shape in  
587 Aquatic and Amphibious Plants. *Plants Basel Switz.* **8**, E420 (2019).
- 588 3. H. Nakayama, *et al.*, Regulation of the KNOX-GA gene module induces heterophyllic  
589 alteration in North American lake cress. *Plant Cell* **26**, 4733–4748 (2014).
- 590 4. G. Li, *et al.*, Water-Wisteria as an ideal plant to study heterophylly in higher aquatic plants.  
591 *Plant Cell Rep.* **36**, 1225–1236 (2017).
- 592 5. G. Li, *et al.*, Establishment of an Agrobacterium mediated transformation protocol for the  
593 detection of cytokinin in the heterophyllous plant *Hygrophila difformis* (Acanthaceae).  
594 *Plant Cell Rep.* **39**, 737–750 (2020).
- 595 6. J. Kim, *et al.*, A molecular basis behind heterophylly in an amphibious plant, *Ranunculus*  
596 *trichophyllus*. *PLoS Genet.* **14**, e1007208 (2018).
- 597 7. H. Koga, M. Kojima, Y. Takebayashi, H. Sakakibara, H. Tsukaya, Identification of the  
598 unique molecular framework of heterophylly in the amphibious plant *Callitriche palustris*  
599 *L.* *Plant Cell* **33**, 3272–3292 (2021).

- 600 8. C. La Rue, Regeneration in *Radicula aquatica*. *Pap. Mich. Acad. Sci. Arts Lett.* **28**, 51–61  
601 (1943).
- 602 9. G. Li, *et al.*, Mechanisms of the Morphological Plasticity Induced by Phytohormones and  
603 the Environment in Plants. *Int. J. Mol. Sci.* **22**, E765 (2021).
- 604 10. D. H. Les, Molecular systematics and taxonomy of lake cress (*Neobeckia aquatica*;  
605 Brassicaceae), an imperiled aquatic mustard. *Aquat. Bot.* **49**, 149–165 (1994).
- 606 11. A. S. Hay, *et al.*, *Cardamine hirsuta*: a versatile genetic system for comparative studies.  
607 *Plant J. Cell Mol. Biol.* **78**, 1–15 (2014).
- 608 12. M. Bar, N. Ori, Compound leaf development in model plant species. *Curr. Opin. Plant Biol.*  
609 **23**, 61–69 (2015).
- 610 13. H. Nakayama, K. Fukushima, T. Fukuda, J. Yokoyama, S. Kimura, Molecular Phylogeny  
611 Determined Using Chloroplast DNA Inferred a New Phylogenetic Relationship of *Rorippa*  
612 *aquatica* (Eaton) EJ Palmer & Steyermark (Brassicaceae)—Lake Cress. *Am. J. Plant Sci.*  
613 **05**, 48–54 (2014).
- 614 14. S. I. Warwick, A. Francis, I. A. Al-Shehbaz, Brassicaceae: Species checklist and database  
615 on CD-Rom. *Plant Syst. Evol.* **259**, 249–258 (2006).
- 616 15. J. G. King, J. D. Hadfield, The evolution of phenotypic plasticity when environments  
617 fluctuate in time and space. *Evol. Lett.* **3**, 15–27 (2019).
- 618 16. E. Lafuente, P. Beldade, Genomics of Developmental Plasticity in Animals. *Front. Genet.*  
619 **10**, 720 (2019).
- 620 17. M. E. Schranz, M. A. Lysak, T. Mitchell-Olds, The ABC's of comparative genomics in the  
621 Brassicaceae: building blocks of crucifer genomes. *Trends Plant Sci.* **11**, 535–542 (2006).
- 622 18. M. A. Lysak, T. Mandáková, M. E. Schranz, Comparative paleogenomics of crucifers:  
623 ancestral genomic blocks revisited. *Curr. Opin. Plant Biol.* **30**, 108–115 (2016).
- 624 19. T. Mandáková, *et al.*, The story of promiscuous crucifers: origin and genome evolution of  
625 an invasive species, *Cardamine occulta* (Brassicaceae), and its relatives. *Ann. Bot.* **124**,  
626 209–220 (2019).

- 627 20. H. Nakayama, *et al.*, Comparative transcriptomics with self-organizing map reveals cryptic  
628 photosynthetic differences between two accessions of North American Lake cress. *Sci. Rep.*  
629 **8**, 3302 (2018).
- 630 21. A. V. Zimin, *et al.*, Hybrid assembly of the large and highly repetitive genome of *Aegilops*  
631 *tauschii*, a progenitor of bread wheat, with the MaSuRCA mega-reads algorithm. *Genome*  
632 *Res.* **27**, 787–792 (2017).
- 633 22. B. J. Haas, *et al.*, Improving the Arabidopsis genome annotation using maximal transcript  
634 alignment assemblies. *Nucleic Acids Res.* **31**, 5654–5666 (2003).
- 635 23. B. J. Haas, *et al.*, Automated eukaryotic gene structure annotation using EVIDENCEModeler  
636 and the Program to Assemble Spliced Alignments. *Genome Biol.* **9**, R7 (2008).
- 637 24. S. M. Jeelani, S. Rani, S. Kumar, S. Kumari, R. C. Gupta, Cytological studies of  
638 Brassicaceae burn. (Cruciferae juss.) from Western Himalayas. *Tsitol. Genet.* **47**, 26–36  
639 (2013).
- 640 25. C.-H. Huang, *et al.*, Resolution of Brassicaceae Phylogeny Using Nuclear Genes Uncovers  
641 Nested Radiations and Supports Convergent Morphological Evolution. *Mol. Biol. Evol.* **33**,  
642 394–412 (2016).
- 643 26. A. R. De La Torre, Z. Li, Y. Van de Peer, P. K. Ingvarsson, Contrasting Rates of Molecular  
644 Evolution and Patterns of Selection among Gymnosperms and Flowering Plants. *Mol. Biol.*  
645 *Evol.* **34**, 1363–1377 (2017).
- 646 27. D. Wanke, The ABA-mediated switch between submersed and emersed life-styles in aquatic  
647 macrophytes. *J. Plant Res.* **124**, 467–475 (2011).
- 648 28. A. Kuwabara, K. Ikegami, T. Koshihara, T. Nagata, Effects of ethylene and abscisic acid upon  
649 heterophylly in *Ludwigia arcuata* (Onagraceae). *Planta* **217**, 880–887 (2003).
- 650 29. Y. K. Lee, *et al.*, *LONGIFOLIA1* and *LONGIFOLIA2*, two homologous genes, regulate  
651 longitudinal cell elongation in *Arabidopsis*. *Dev. Camb. Engl.* **133**, 4305–4314 (2006).
- 652 30. D. Vlad, *et al.*, Leaf shape evolution through duplication, regulatory diversification, and  
653 loss of a homeobox gene. *Science* **343**, 780–783 (2014).

- 654 31. Y. Eshed, A. Izhaki, S. F. Baum, S. K. Floyd, J. L. Bowman, Asymmetric leaf development  
655 and blade expansion in *Arabidopsis* are mediated by KANADI and YABBY activities. *Dev.*  
656 *Camb. Engl.* **131**, 2997–3006 (2004).
- 657 32. J. F. Emery, *et al.*, Radial patterning of Arabidopsis shoots by class III HD-ZIP and  
658 KANADI genes. *Curr. Biol. CB* **13**, 1768–1774 (2003).
- 659 33. T. Mandáková, *et al.*, The more the merrier: recent hybridization and polyploidy in  
660 *Cardamine*. *Plant Cell* **25**, 3280–3295 (2013).
- 661 34. T. Mandáková, A. D. Gloss, N. K. Whiteman, M. A. Lysak, How diploidization turned a  
662 tetraploid into a pseudotriploid. *Am. J. Bot.* **103**, 1187–1196 (2016).
- 663 35. T. Mandáková, M. A. Lysak, Healthy Roots and Leaves: Comparative Genome Structure of  
664 Horseradish and Watercress. *Plant Physiol.* **179**, 66–73 (2019).
- 665 36. B. M. Binder, Ethylene signaling in plants. *J. Biol. Chem.* **295**, 7710–7725 (2020).
- 666 37. M. Nakata, *et al.*, Roles of the middle domain-specific *WUSCHEL-RELATED*  
667 *HOMEBOX* genes in early development of leaves in *Arabidopsis*. *Plant Cell* **24**, 519–535  
668 (2012).
- 669 38. R. Pierik, G. C. Whitelam, L. A. C. J. Voesenek, H. de Kroon, E. J. W. Visser, Canopy studies  
670 on ethylene-insensitive tobacco identify ethylene as a novel element in blue light and plant-  
671 plant signalling. *Plant J. Cell Mol. Biol.* **38**, 310–319 (2004).
- 672 39. C. Lin, Plant blue-light receptors. *Trends Plant Sci.* **5**, 337–342 (2000).
- 673 40. P. Sharma, M. Chatterjee, N. Burman, J. P. Khurana, Cryptochrome 1 regulates growth and  
674 development in Brassica through alteration in the expression of genes involved in light,  
675 phytohormone and stress signalling. *Plant Cell Environ.* **37**, 961–977 (2014).
- 676 41. B. L. Lin, W. J. Yang, Blue light and abscisic acid independently induce heterophyllous  
677 switch in *Marsilea quadrifolia*. *Plant Physiol.* **119**, 429–434 (1999).
- 678 42. R. Amano, *et al.*, Molecular Basis for Natural Vegetative Propagation via Regeneration in  
679 North American Lake Cress, *Rorippa aquatica* (Brassicaceae). *Plant Cell Physiol.* **61**, 353–  
680 369 (2020).

- 681 43. M. A. Lysak, T. Mandáková, Analysis of plant meiotic chromosomes by chromosome  
682 painting. *Methods Mol. Biol. Clifton NJ* **990**, 13–24 (2013).
- 683 44. T. Mandáková, M. A. Lysak, Chromosome Preparation for Cytogenetic Analyses in  
684 *Arabidopsis*. *Curr. Protoc. Plant Biol.* **1**, 43–51 (2016).
- 685 45. T. Mandáková, M. A. Lysak, Painting of Arabidopsis Chromosomes with Chromosome-  
686 Specific BAC Clones. *Curr. Protoc. Plant Biol.* **1**, 359–371 (2016).
- 687 46. S. Grob, U. Grossniklaus, Chromatin Conformation Capture-Based Analysis of Nuclear  
688 Architecture. *Methods Mol. Biol. Clifton NJ* **1456**, 15–32 (2017).
- 689 47. B. J. Walker, *et al.*, Pilon: An Integrated Tool for Comprehensive Microbial Variant  
690 Detection and Genome Assembly Improvement. *PLOS ONE* **9**, e112963 (2014).
- 691 48. O. Dudchenko, *et al.*, De novo assembly of the *Aedes aegypti* genome using Hi-C yields  
692 chromosome-length scaffolds. *Science* **356**, 92–95 (2017).
- 693 49. G.-C. Xu, *et al.*, LR\_Gapcloser: a tiling path-based gap closer that uses long reads to  
694 complete genome assembly. *GigaScience* **8** (2019).
- 695 50. E. Haghshenas, F. Hach, S. C. Sahinalp, C. Chauve, CoLoRMap: Correcting Long Reads  
696 by Mapping short reads. *Bioinforma. Oxf. Engl.* **32**, i545–i551 (2016).
- 697 51. F. A. Simão, R. M. Waterhouse, P. Ioannidis, E. V. Kriventseva, E. M. Zdobnov, BUSCO:  
698 assessing genome assembly and annotation completeness with single-copy orthologs.  
699 *Bioinforma. Oxf. Engl.* **31**, 3210–3212 (2015).
- 700 52. M. Stanke, S. Waack, Gene prediction with a hidden Markov model and a new intron  
701 submodel. *Bioinforma. Oxf. Engl.* **19 Suppl 2**, ii215–225 (2003).
- 702 53. S. L. Salzberg, M. Pertea, A. L. Delcher, M. J. Gardner, H. Tettelin, Interpolated Markov  
703 models for eukaryotic gene finding. *Genomics* **59**, 24–31 (1999).
- 704 54. M. G. Grabherr, *et al.*, Full-length transcriptome assembly from RNA-Seq data without a  
705 reference genome. *Nat. Biotechnol.* **29**, 644–652 (2011).
- 706 55. J. E. Allen, M. Pertea, S. L. Salzberg, Computational gene prediction using multiple sources  
707 of evidence. *Genome Res.* **14**, 142–148 (2004).

- 708 56. A. Conesa, S. Götz, Blast2GO: A comprehensive suite for functional analysis in plant  
709 genomics. *Int. J. Plant Genomics* **2008**, 619832 (2008).
- 710 57. S. Kurtz, *et al.*, Versatile and open software for comparing large genomes. *Genome Biol.* **5**,  
711 R12 (2004).
- 712 58. M. I. Krzywinski, *et al.*, Circos: An information aesthetic for comparative genomics.  
713 *Genome Res.* (2009) <https://doi.org/10.1101/gr.092759.109> (December 6, 2021).
- 714 59. X. Gan, *et al.*, The *Cardamine hirsuta* genome offers insight into the evolution of  
715 morphological diversity. *Nat. Plants* **2**, 16167 (2016).
- 716 60. S. L. Byrne, *et al.*, The genome sequence of *Barbarea vulgaris* facilitates the study of  
717 ecological biochemistry. *Sci. Rep.* **7**, 40728 (2017).
- 718 61. D. R. Zerbino, E. Birney, Velvet: algorithms for de novo short read assembly using de Bruijn  
719 graphs. *Genome Res.* **18**, 821–829 (2008).
- 720 62. D. M. Emms, S. Kelly, OrthoFinder: solving fundamental biases in whole genome  
721 comparisons dramatically improves orthogroup inference accuracy. *Genome Biol.* **16**, 157  
722 (2015).
- 723 63. V. Ranwez, S. Harispe, F. Delsuc, E. J. P. Douzery, MACSE: Multiple Alignment of Coding  
724 SEquences Accounting for Frameshifts and Stop Codons. *PLOS ONE* **6**, e22594 (2011).
- 725 64. M. D. Robinson, D. J. McCarthy, G. K. Smyth, edgeR: a Bioconductor package for  
726 differential expression analysis of digital gene expression data. *Bioinforma. Oxf. Engl.* **26**,  
727 139–140 (2010).
- 728  
729

730 **Figures**

731

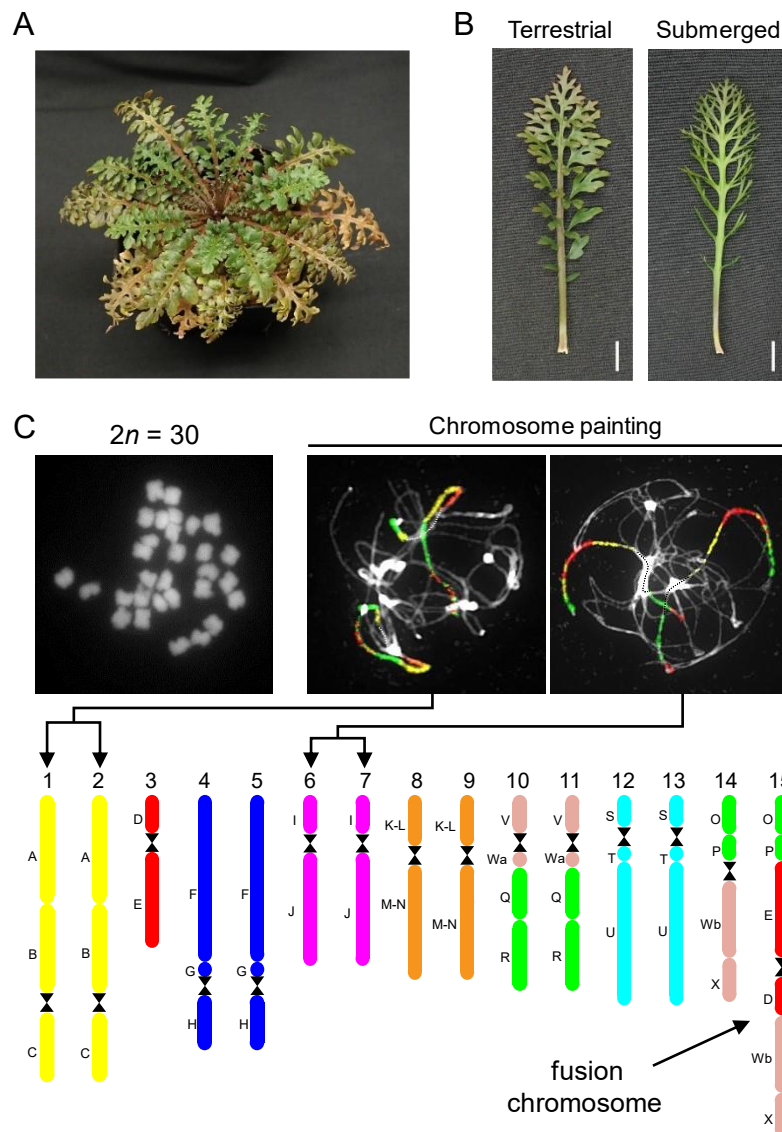

732

733 **Figure 1.** Physiological characteristics and chromosome structure of *R. aquatica*.

734 (A) *R. aquatica* grown under terrestrial condition at 25 °C. (B) Expanded leaves of *R. aquatica*

735 grown under terrestrial and submerged conditions at 25 °C (scale bars, 1 cm). (C) Chromosome

736 structure of *R. aquatica*. DAPI-stained mitotic chromosomes prepared from anthers (upper left

737 panel). Chromosome structure (lower panel) was revealed via comparative chromosome painting

738 (Panel C, upper right). The different colors in chromosome structure correspond to the ancestral

739 Cardamineae chromosomes, whereas capital letters refer to genomic blocks. See Fig. 2 for

740 detailed structure of the fusion chromosome.

741

742

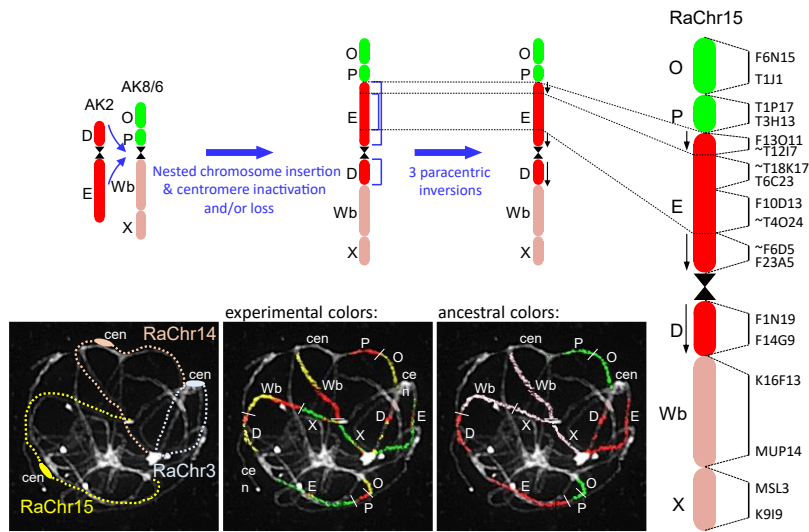

743

744

745 **Figure 2.** Structure of the fusion chromosome RaChr15 revealed by Comparative Chromosome  
 746 Painting (CCP) of pachytene chromosomes. The different colors correspond to the ancestral  
 747 Cardamineae chromosomes, whereas capital letters refer to genomic blocks. Bacterial Artificial  
 748 Chromosome (BAC) clones of *Arabidopsis thaliana* defining genomic blocks or their parts are  
 749 listed along the chromosome RaChr15. Centromeres are indicated by black hourglass symbols.  
 750 Blue arrows and staples denote chromosome rearrangements. Black arrows along chromosome  
 751 indicate the opposite orientation of chromosome regions as compared to the ancestral  
 752 chromosome AK2.



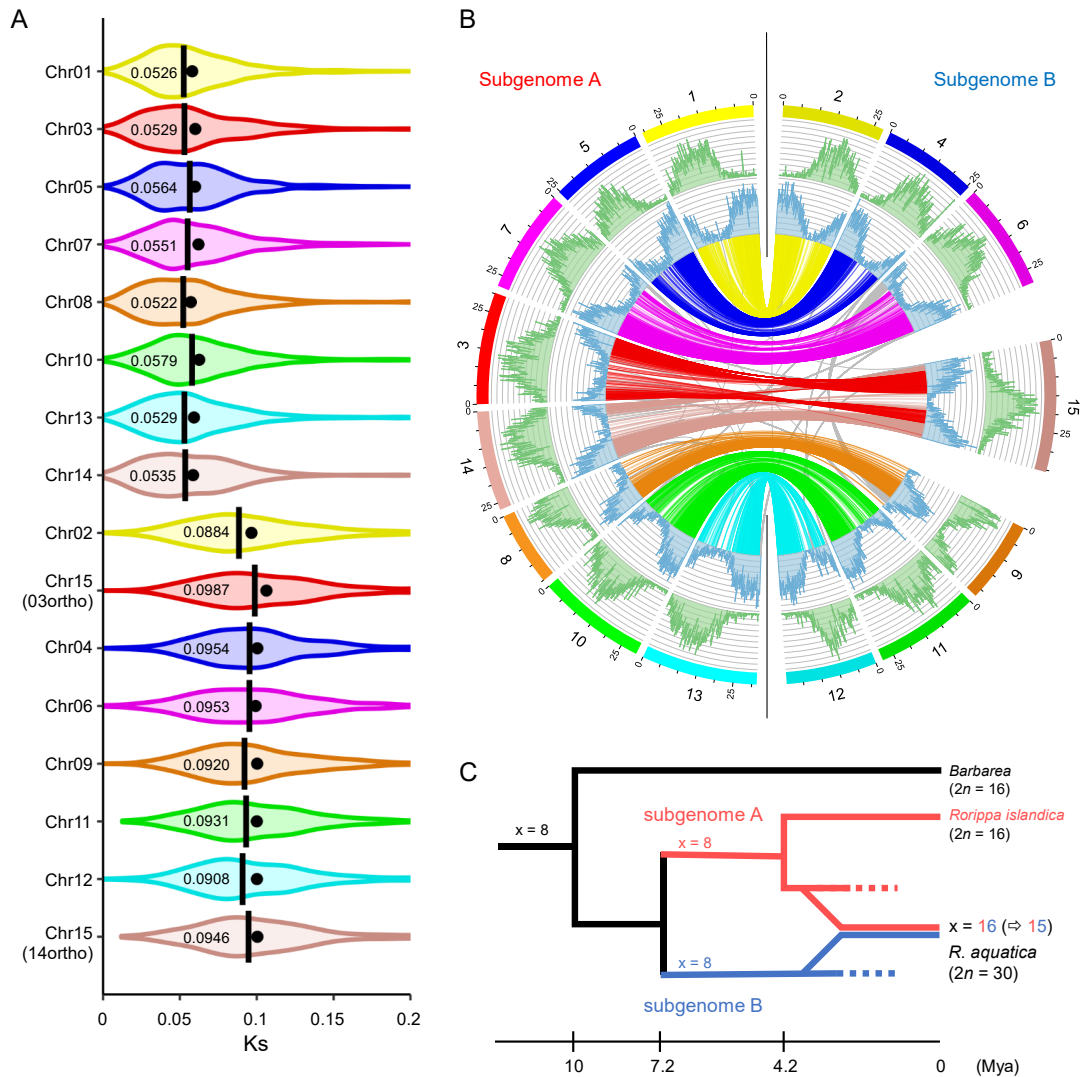

753

754

**Figure 3.** *Rorippa aquatica* chromosome-level genome assembly.

755

(A) Chromosome-level synonymous nucleotide substitution rate (Ks) distributions relative to the

756

*R. islandica*, for *R. aquatica* paralogs in orthologous chromosomes. Closed circles: mean; bars

757

and numbers: median. (B) Circos plot of the assembled *R. aquatica* genome. In the Circos plot,

758

the long terminal repeat and gene distributions are in green and blue, respectively. The lines at the

759

center link the paralogous genes for which orthologous genes were conserved as single copy in

760

diploid Brassicaceae species. (C) Evolutionary scheme of the formation the allotetraploid genome

761

of *R. aquatica* based on the present data.

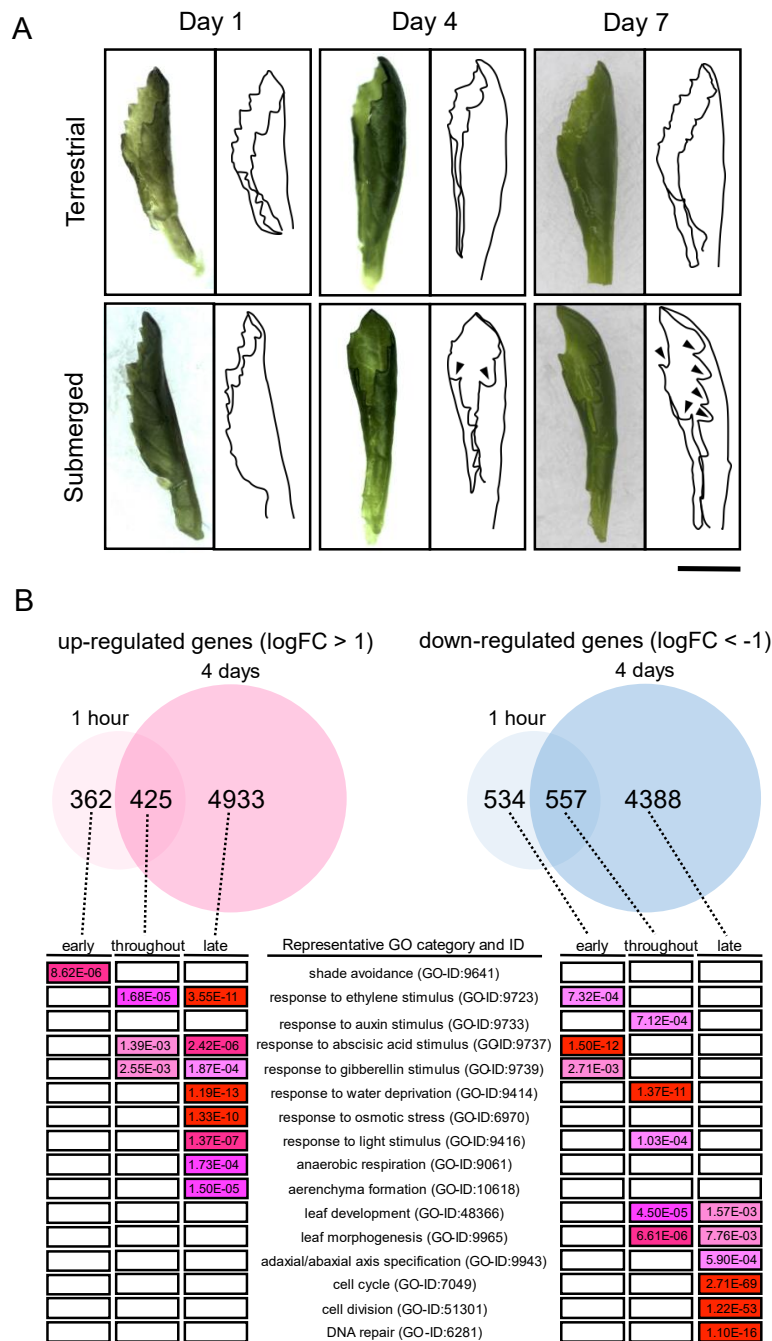

762

763 **Figure 4.** The effect of submergence on *Rorippa aquatica* leaf morphology and gene expression.  
 764 (A) Images and outlines of newly emerged young leaves after transfer to terrestrial or submerged  
 765 conditions (scale bar, 1 cm). (B) Transcriptome analysis of leaves grown under the submerged  
 766 condition. Differentially Expressed Genes (DEGs) were identified based on significant  
 767 differences in expression and log fold change |LogFC| > 1. Based on their expression patterns,  
 768 DEGs were categorized as “early response genes” (responding only within the first hour), “late-

769 response genes” (after 4 days), and “throughout-response genes” (throughout submergence), then  
 770 subjected to Gene Ontology enrichment analysis (significantly enriched categories are shown).

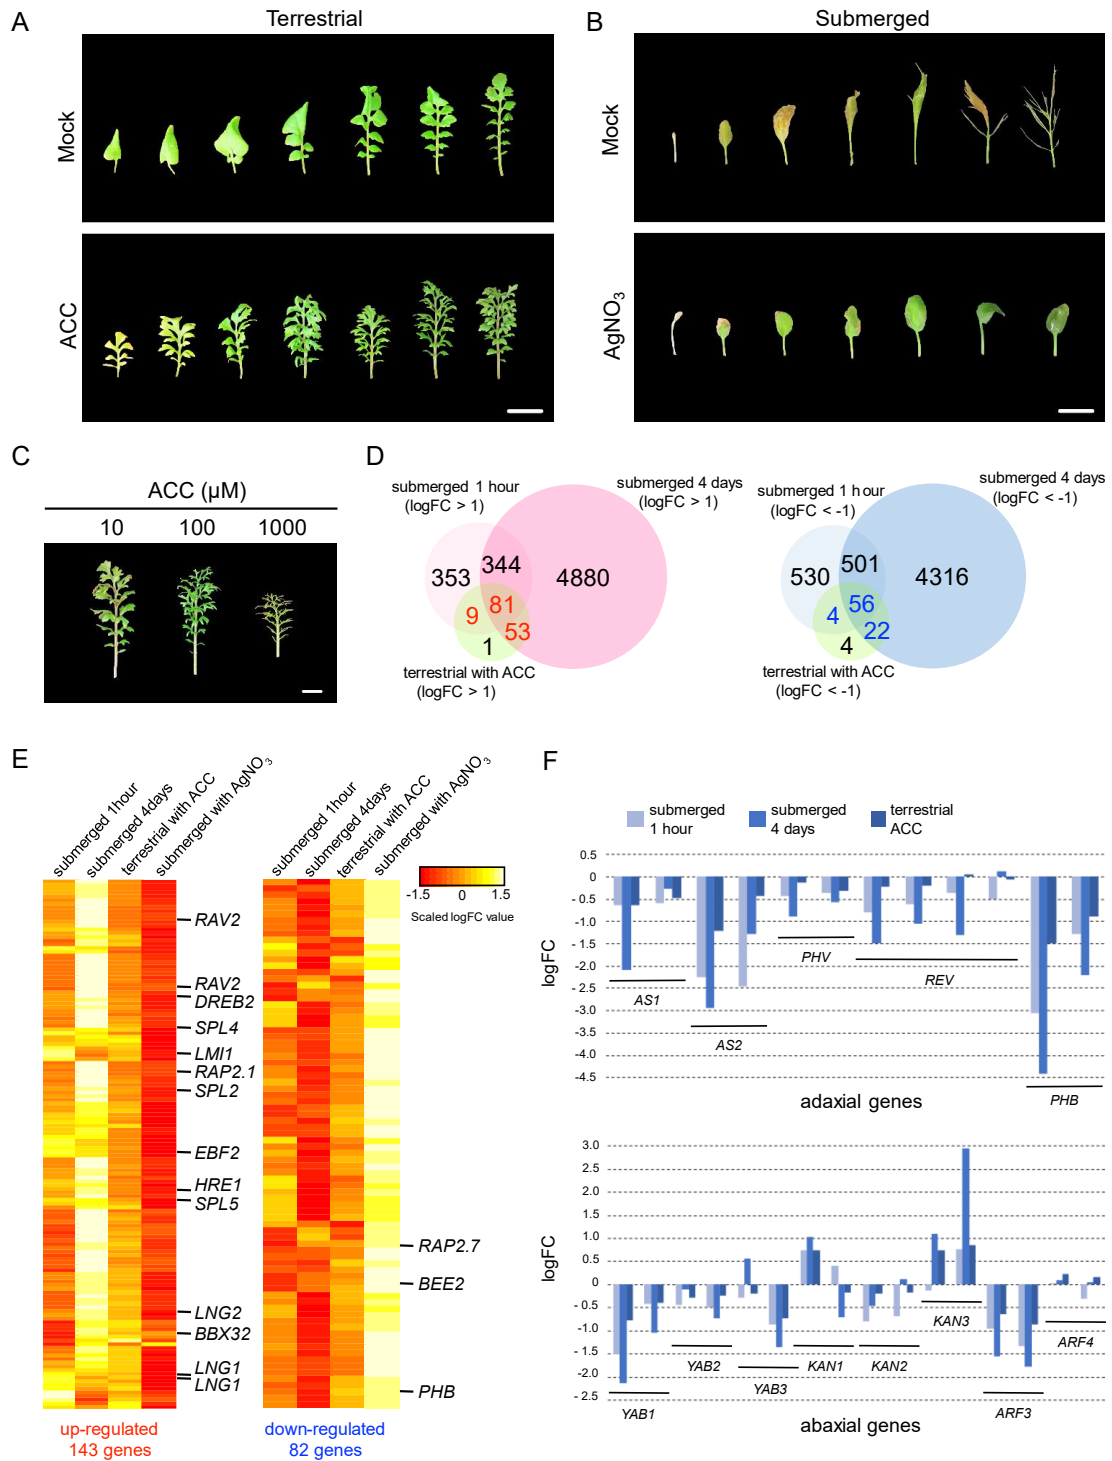

771

772 **Figure 5.** Effect of ethylene on *Rorippa aquatica* heterophyly.

773 Leaves produced after treatment with (A) mock or 100 μM 1-aminocyclopropane-1-carboxylic

774 acid (ACC, an ethylene precursor) under terrestrial conditions, or (B) mock or 1 μM AgNO<sub>3</sub>

775 (ethylene inhibitor) under submerged conditions (scale bars, 1 cm). (C) Ethylene-dose effect  
 776 under terrestrial conditions, with different ACC concentrations (scale bars, 1 cm). (D) Selection  
 777 of candidate genes that induce submerged-phenotype leaves: genes that were up- or down-  
 778 regulated under either submergence or ethylene treatment were used as candidates. (E) Candidate  
 779 gene expression profiles. (F) Responses of adaxial–abaxial polarity determining genes to the  
 780 submergence and ethylene treatments.

781

782

783

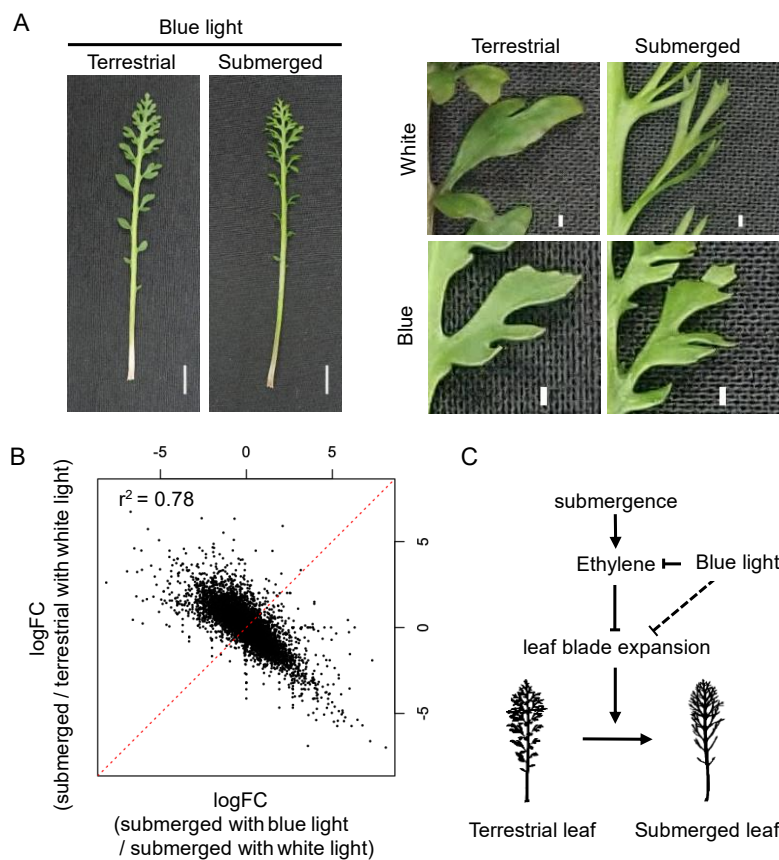

784

785 **Figure 6.** The effect of blue light on *Rorippa aquatica* heterophylly.

786 (A) Mature leaves grown under blue light conditions (left panel; scale bar, 1 cm); magnified view  
 787 of leaflet (right panel; scale bar, 1 mm). (B) Leaf transcriptome profile under white and blue light

788 conditions. (C) Mechanistic model for heterophylly in response to submergence.
